# Supplementary material
Source: Springer Nature journal article supplement (https://www.springermedizin.de/resource/supplementary/12876_2010_643_MOESM4_ESM.pdf/9437140)

**% of low income**

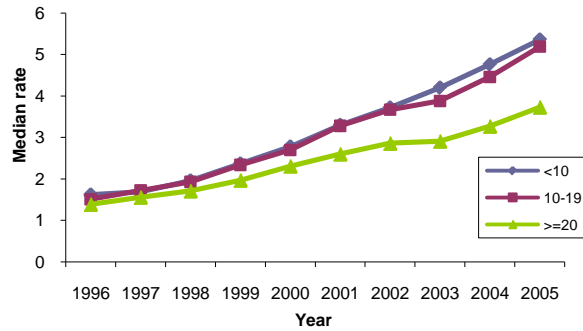

**% with less than high school education**

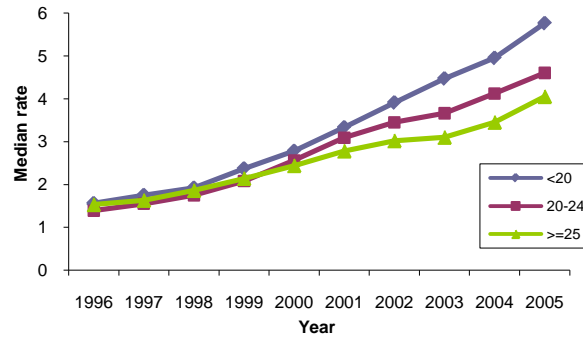

**% employment**

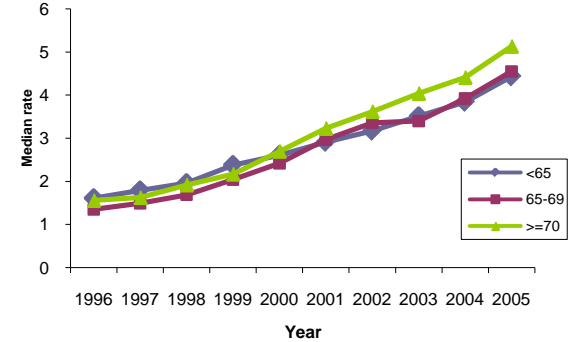

**% of non-immigrants**

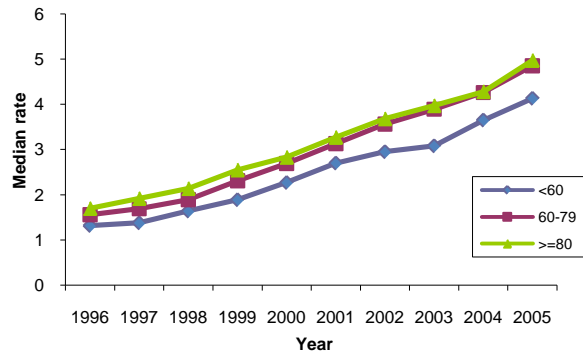

**% of visible minority**

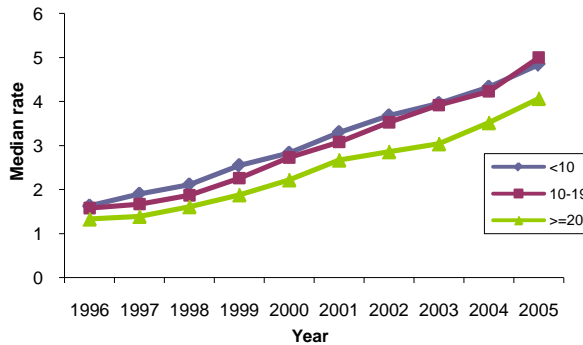

**% cannot speak English/French**

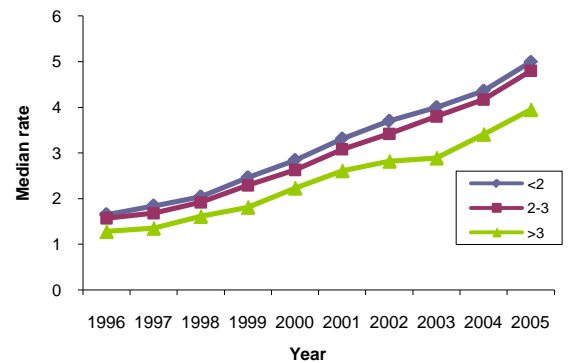

**% with comorbidites**

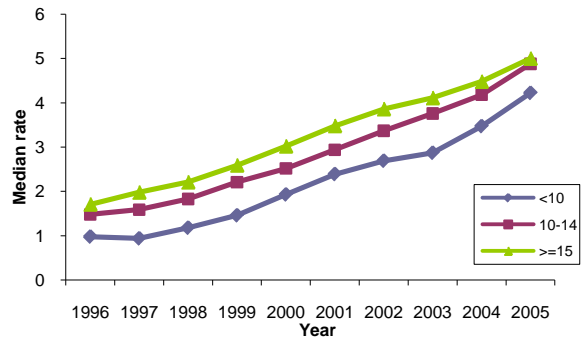

**% of male patients**

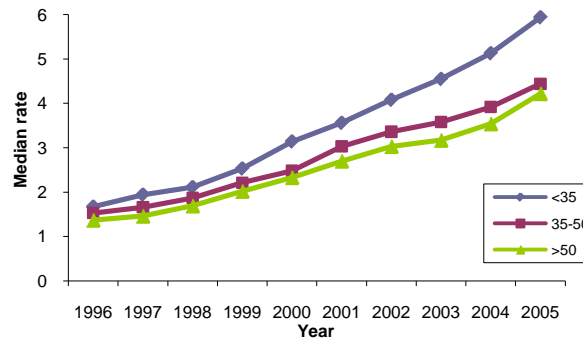

**% residing in rural area**

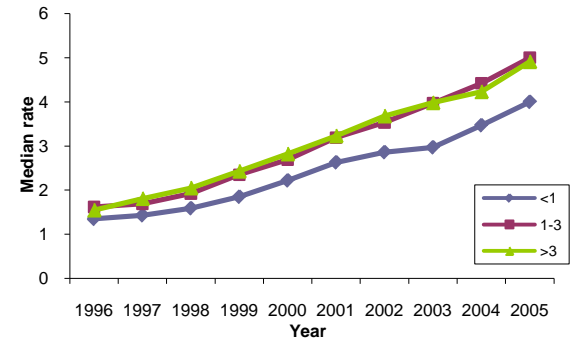

Supplement: MOESM4 [file 9437140]
